# Supplementary material for: A study of measurement scenarios for the future CO2M mission: avoidance of detector saturation and the impact on XCO2 retrievals
Source: Copernicus journal article supplement (doi:10.5194/egusphere-2024-3857), 2025-01-22
Supplement: Supplementary file [file egusphere-2024-3857-AC1-supplement.pdf]

## Response to comments by Referee #1 of EGU sphere-2024-3857

Dear Referee,

Thank you very much for this comprehensive review of our manuscript which helped to improve the manuscript. Please find below our point-by-point responses to your comments. The comments are printed in italics and our responses are shown in upright font.

Kind regards and on behalf of all authors,

Michael Weimer

*The paper is in general written in a clear and succinct manner and the reasoning is good to follow. The subject is highly relevant for the future CO<sub>2</sub> mission.*

*There are however a few points, where clarifications are needed and the consistency needs to be checked. The biggest question I have is (see also SC2), if – instead of using oversampling higher than one – the sampling time can be decreased? Has this been investigated? Now the investigation is reduced to integration times of 271, 117 and 66ms. What would for example 250 ms sampling time produce as a result? Then the ground sample would be about 1.8 x 1.8 km, so the ground resolution would be higher (and produce symmetric ground pixels). What are the reasons to use 271 ms? With a back of the envelope calculation (using the results from Table 1) I estimate that 208 ms integration time are needed that the 24% saturated pixels for the OSF=1 case are within the FWC limit. Are there limitations on datavolume, internal datarate, synchronization of read-outs, co-registration or other reasons to use 308ms sampling time? Is there an estimate of the level of saturation versus integration time? How large are the signal independent contributions (dark current, thermal background, offset)? Can they be reduced? Please address these points in the article.*

Authors' response: The timing of the CO<sub>2</sub>/NO<sub>2</sub> instrument is driven by the requirements for a) spatial sampling ( $\leq 4 \text{ km}^2$ ) and b) SNR of the spectral radiance measurement. The ACT spatial sampling distance is given by the design of the slit homogenizer (as well as detector size and optical magnification), and is fixed to 1.8 km. This allows for a maximum of  $\sim 2.2 \text{ km}$  spatial sampling distance (SSD) in ALT. At the CO<sub>2</sub>M orbit this amounts to a sampling time of  $\sim 308 \text{ ms}$ . We added this explanation to the manuscript in Sect. 2. Since the SWIR detectors are operated in "Integration Then Read" (ITR) readout mode, there is a readout-time of 37 ms at the end of each frame (or scanline acquisition) during these 308 ms. We added this explanation also in the manuscript before Eq. 2: "It has been decided to operate CO<sub>2</sub>'s SWIR detectors in "Integration Then Read" mode, in order to minimize bias effects from the detector's read-out electronics. In this mode, the signal of every acquired frame has to be completely read out before a new acquisition is started. During the read-out time  $t_{\text{RO}}$  of about 37 ms, the signal integration is paused."

The largest possible integration time (which is reached in OSF1) is therefore  $308 \text{ ms} - 37 \text{ ms} = 271 \text{ ms}$ . So 271 ms is the effective integration time in mode OSF1,  $308 \text{ ms} - (2 \cdot 37 \text{ ms}) = 2 \cdot 117 \text{ ms} = 234 \text{ ms}$  for OSF2, and so on for higher OSFs. A reduction of the sampling time (common to all bands) would indeed reduce the fraction of saturated pixels. However, in that case the most saturated band would dictate the maximum sampling (and hence integration) time for all other bands, as they have to be synchronized to comply with spatial co-registration. If the

SWIR1 is then taken as the driving band, the lower integration time (e.g. 208 ms) would lead to an integration time of  $208 \text{ ms} - 37 \text{ ms} = 171 \text{ ms}$ . This would lead to a reduction of integration time of  $\sim 37\%$ , which would lead to lower SNR of  $\sqrt{171 \text{ ms} / 271 \text{ ms}} = 21 \%$  globally for all ground pixels. The SNR requirement is specified for rather dark reference radiances, and such reduction of SNR performance would certainly lead to non-compliance to the specification. To clarify this, we added a sentence to line 118 of the preprint: “The value of 308 ms was used to meet all demands within the mission requirements.”

There are limitations on all of the mentioned parameters. However, as explained above, the 308 ms are the result of Space Segment Requirements (the instrument design, incl. data rate is then tuned to meet the specification). As pointed out above, the integration time is fixed and follows (for each OSF) from requirements and design considerations (readout mode). Signal independent contributors to the signal (and SNR), such as dark current and thermal background) can theoretically be reduced, most notably by operating detectors and optics at colder temperatures. However, these operational parameters have been fixed by the payload prime and are not within the scope of this paper. We agree that one result of this study is that also the sampling time could be reduced to avoid the caveats of an additional read-out, but this requires further studies in the future. Therefore, we added a corresponding paragraph to the conclusions (line 374): “This study used a fixed sampling period of 308 ms to meet the mission requirements. In principle, this value can be adjusted as well in order to get the optimum between SNR and saturation avoidance. Further investigations in the future could include the reduction of the sampling period instead of increasing the OSF. However, a smaller sampling period would further reduce the SNR and synchronization of the CO2I/NO2I spectrometers might become more difficult with a smaller sampling period.”

**SC1 (line 86):** CO2I -> CO2I/NO2I: the slit is also shared with the VIS spectrometer, so CO2I alone is not accurate

Authors' response: We replaced all occurrences of CO2I by “CO2I/NO2I” where it relates to the whole instrument and not to the CO2I spectrometers only.

**SC2 (line 92):** As an alternative to the OSF couldn't the sampling time of 308ms be reduced? With 250 ms the ground sample would be about 1.8 km x 1.8km. Why not? What are the limitations (detector limitations, datavolume,...)? Is there an estimation how short the exposure time would have to be to avoid saturation everywhere? See also separate discussion above.

Authors' response: see our response to the main comment above. There are limitations and requirements that lead to the value of 308 ms.

**SC3 (line 110):** The spatial sampling is not affected, but I would expect an impact on the the spatial energy distribution function. Can you please comment on this?

Authors' response: We did idealized tests about this in the context of this study where we convolved the signal with the IFOV, assuming a perfect instrument with rectangular FOV and same sensitivity at the edge as in the center. When doing this, the signal for OSF = 2 is reduced to a minimum of 68 % when the signal **only** comes from the gap created by the detector read-out, see Figure AR1 in this response. Hence, even if the whole signal comes from a region which is never measured by the middle ALT

detector pixels, the signal still is 68 % because of the IFOV of 0.4 km. This is an extreme case and more realistically, the differences in and outside the gap will be much smaller, see e.g. right panel of this figure, where the radiance is 80 % of that in the gap and the fraction is 84 % of the radiance after 271 ms. Therefore, yes, it has some impact on the distribution of the signal but it is considered to be small, which resulted in the sentence in the manuscript.

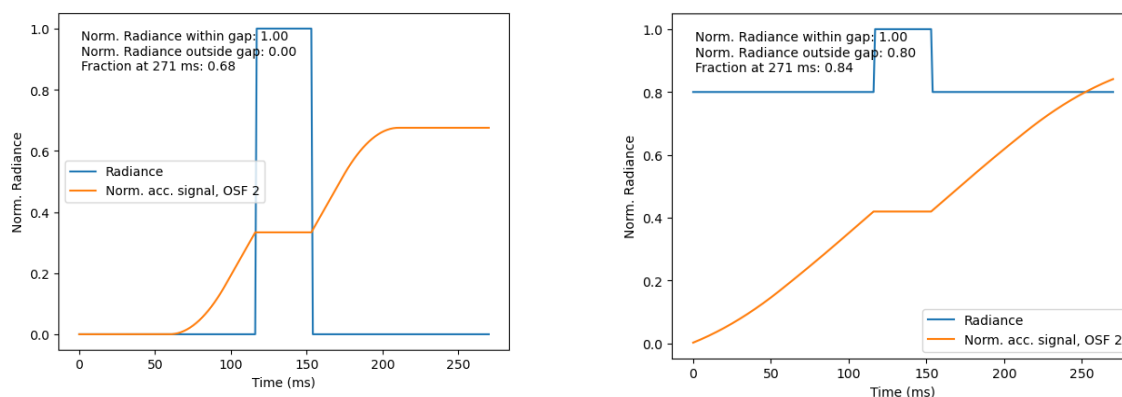

**Figure AR1:** Normalized radiance (blue) and accumulated signal for an OSF of two (orange) for two cases: Radiance only comes from the gap for read-out (left) and the radiance is 80 % in the surrounding in comparison to that in the gap (right).

**SC4 (line 114):** *Only the detectors for SWIR 1 and 2 are mentioned here. What about NIR? What is the FWC of the NIR detector? Is it the same?*

Authors' response: The detector used in the VIS and NIR bands is the CIS-120 from Te2v. It has a FWC of 61.000e-, and OSF adaptation to avoid saturation is indeed planned. E.g. OSF is tunable between 3-7 in VIS and between 1-3 in NIR. However, since the SNR in these two bands is significantly less affected by multiple readouts due to the lower readout noise per acquisition (60e- vs 150e- in SWIR), it is assumed that the SNR performance in NIR will be better than in SWIR, and therefore has no significant impact on the three-band retrieval performance. We added the FWC of the NIR detector of about 61 ke- to the manuscript: "The detectors used for the NIR detector (Teledyne-E2V) and the two SWIR spectrometers of CO2I/NO2I (Lynred NGP) feature a FWC of approximately 61.000 and 650.000 electrons, respectively."

**SC5 (line 118):** *"a radiance spectrum with saturated pixels has to be discarded" The reasoning to discard the entire spectrum is not described clearly. I would advice to change the order of this paragraph somewhat and mention firstly (as described in line 268) that not single pixels but at least 60 are affected (what fraction is that of the spectrum?) and secondly that this impacts the straylight correction.*

Authors' response: We basically moved the description around line 268 up to line 118 with replacing 60 pixels by 3 %: "Such pixels do not yield meaningful measurements and tests showed that if saturation occurs it usually does not happen only at one spectral detector pixel but for more than 3 % of the pixels with the largest signal. Therefore, it can be expected that a large fraction of the continuum range of the spectrum is affected by saturation so that the measurement is not useful for the retrieval and a radiance spectrum with saturated pixels has to be discarded." In addition, we replaced the introductory sentences around line 268 by the

following: “As discussed in Sect. 2, spectra including saturated measurements have to be discarded, which will reduce the spatial coverage on Earth.”

**SC6 (line 126):** *"neglect the effect... on neighbored spatial samples" . This is unclear: do you mean other viewing angles/swath angles/ spatial samples in the same frame where saturation occurs? Then it should be excluded as a whole anyways, as the straylight correction would be insufficient. Or do you mean the impact on following read-outs? (see next comment).*

Authors' response: It refers to the same frame and we added "...neighboring spatial samples in the swath" to the sentence. We did the analysis also with removing whole swaths instead of single spatial samples in the context of this study, resulting in a total fraction of 47 % of left data for OSF111 with similar spatial distribution as in Figure 5 in the manuscript. Apart from that, the results showed only minor changes. We decided to add this analysis as another appendix, now Appendix B, to the manuscript, which we refer to in line 276: "Because of possible stray light effects, we also did the analysis with removing whole swaths instead of single spatial samples, which can be found in Appendix B, and where a fraction of 47.3 % remains after filtering for saturation."

**SC7 (line 127):** *Is there anything known about detector blooming or the effect of pixel saturation on the following (unsaturated) read-outs? Is there a memory effect? Or is the assumption here that only an individual frame is affected?*

Authors' response: Blooming effects (spatial-spectral signal spillover) would be another reason to avoid saturation. However, blooming is assumed to be eliminated by the anti-blooming functionality, which is integrated into the ROIC of the NGP detector. Anti-blooming avoids signal spillover to neighboring pixels even if the FWC is reached. Memory effects (temporal signal spillover) has indeed been detected in both the CIS-120 and NGP detectors (used for the NIR and SWIR bands, respectively). They are a topic of dedicated studies, some of which have also been published (see e.g. Gaucel et al. (2023): Remanence characterization of NGP detector in SWIR bands, <https://doi.org/10.1117/12.2689982>). The influence of saturation on signal persistence or memory effects is out of the scope of this paper. However, we added possible complications arising from such effects in the introduction, as an additional motivation for the study (around line 66 of the preprint): "In addition, saturation could affect subsequent measurements due to memory effects (Gaucel et al., 2023)." and added "and memory effects" to line 127.

**SC8 (line 168):** *Can something be said about the off-nadir angles? Is the effect of saturation expected to be smaller there? And do you then assume the nadir spectrum for all viewing angles (spatial samples on the detector). This sentence seems to contradict the statement in line 126.*

Authors' response: We agree that this statement is confusing. Of course, we take into account the viewing geometry within the swath of the instrument. We replaced "nadir geometry" by "the nadir mode of CO2M" because we wanted to separate it from the glint mode, which was not used in this study.

**SC9 (line 242):** *The numbers in the text are not consistent with the insets in Fig. 3. If you want to give ranges which include all bands, it should be 67 and 86% and 47 to 73 % for OSF 2. Or you can remove "in all bands" in line 243 and use the ranges 67-92% and 47-83%*

Authors' response: We replaced "89" by "92" % and removed "in all bands" as suggested.

**SC10 (line 256):** *"some high SNR values have a large noise error" Could you please add an explanation why that is the case?*

Authors' response: In general, radiances in the NIR band are less sensitive to changes of CO<sub>2</sub> in the atmosphere. Therefore, the relation between noise error and SNR is not as straight-forward as for the other bands. We added the following explanation to the sentence: "[...] because radiances in the NIR band are less sensitive to changes of CO<sub>2</sub> (only indirectly due to the dependence of the retrieved XCO<sub>2</sub> on atmospheric scattering and on the air column or surface pressure) than in the other bands."

**SC11 (line 306):** *"not done in this analysis": was this shown elsewhere? Please add a reference.*

Authors' response: We now refer to Noël et al. (2024) in the manuscript where they separated systematic from random contributions by using high- and low-pass filters. We also rephrased the complete sentence: "Note that this value includes both systematic and random errors that were not separated in this analysis, as e.g. in Noël et al. (2024)."

**SC12 (line 312):** *"decreased by about 20%", is this due to the saturation filtering? Please clarify this in the manuscript.*

Authors' response: Yes. We added "due to the saturation filtering" at the end of the sentence.

**SC13 (line 333):** *"glint mode could change", change in what way? Please specify what you expect.*

Authors' response: This was not in the scope of this study. We expect different results because the signals in glint mode will be different. This will probably have to be optimized for each mode and satellite separately. We also already refer to glint in the conclusions that studies of the glint mode are needed in the future.

**TC1 (line 1):** *"Human [...] release" .... . The use of human as an adjective in this sentence sounds somewhat unusual to me. Consider replacing it by "release by humans" (also line 18)*

Authors' response: Corrected as suggested.

**TC2 (line 12):** *typo: sarutarion --> saturation*

Authors' response: Corrected.

**TC3 (line 37):** *"or" -> shouldn't this be "and" ?*

Authors' response: Yes, corrected.

**TC4 (line 42):** *Listing the NO<sub>2</sub>I together with CLIM and MAP suggests that it is a separate instrument from the CO<sub>2</sub>I, that is confusing considering the description later (see also comment line 83)*

Authors' response: We added to the sentence that NO<sub>2</sub>I shares the same slit with CO<sub>2</sub>I.

**TC5 (line 83):** *CO<sub>2</sub>I/NO<sub>2</sub>I: earlier CO<sub>2</sub>I and NO<sub>2</sub>I are described as separate. Please keep this consistent, I would advice to use CO<sub>2</sub>I/NO<sub>2</sub>I*

Authors' response: We replaced all occurrences of CO<sub>2</sub>I by "CO<sub>2</sub>I/NO<sub>2</sub>I" where the sentence relates to the whole instrument and not to the CO<sub>2</sub>I spectrometers only.

**TC6 (line 126):** *neighbored -> neighboring*

Authors' response: Corrected.

**TC7 Fig 2:** *typo: "white colours" --> white colour*

Authors' response: Corrected.

**TC8 Fig 2:** *Please consider decreasing the white space between the panels to make the actual figure content larger.*

Authors' response: Corrected as suggested.

**TC9 Table 1 caption:** *The caption reads rather difficult, could you rephrase it?*

Authors' response: We rephrased it to: "Fraction of cloud-free spatial samples (in %) for which the radiance is between the saturation limits of OSF and OSF minus one in the 1-year dataset of simulated radiances."

**TC10 Fig 8 caption:** *"Note that the fraction is ..." there seems to be something missing in this sentence, please correct.*

Authors' response: We added "to" between "related" and "the data".
